# Supplementary material for: The BOOST paediatric advance care planning intervention for adolescents with cancer and their parents: development, acceptability and feasibility
Source: Springer Nature journal article supplement (doi:10.1186/s12887-022-03247-9), 2022-04-15
Supplement: MOESM1 [file 20315558]

## Additional file 1. Evolution of specifications and adaptations to the BOOST pACP intervention components

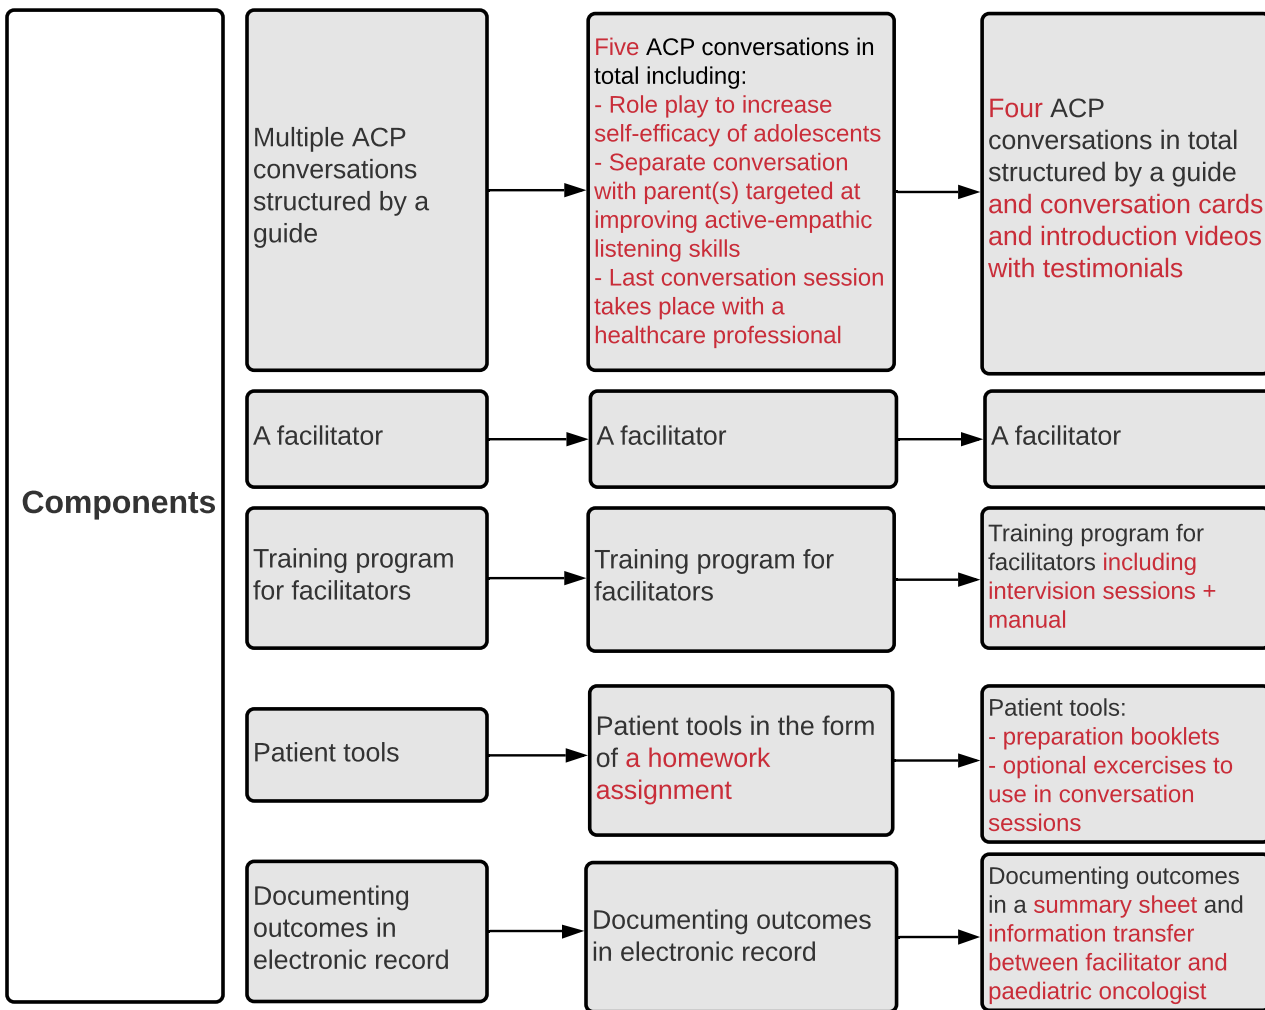

Text in red highlights the specifications/adaptations to the BOOST pACP intervention components
